# Supplementary material for: Lateralized alpha oscillations are irrelevant for the behavioral retro-cueing benefit in visual working memory
Source: PeerJ journal article supplement (doi:10.7717/peerj.9398), 2020-06-23

### International 10/20

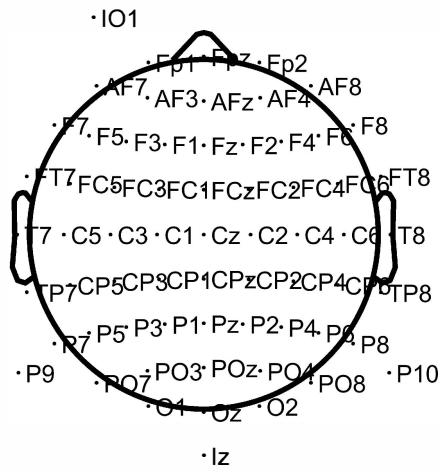

### Easycap M34

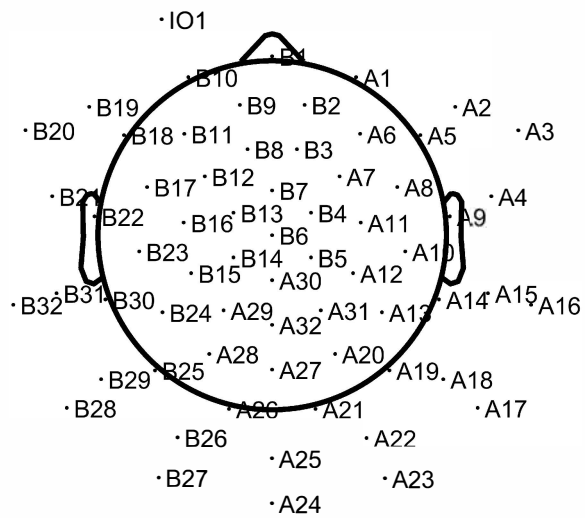

Supplement: comparison_EEG_layouts_moessing_busch_2020.pdf [file comparison_EEG_layouts_moessing_busch_2020.pdf]
